# Supplementary material for: Microbiome variation at the clam-sediment interface may explain changes in local productivity of Chamelea gallina in the North Adriatic sea
Source: Springer Nature journal article supplement (doi:10.1186/s12866-023-03146-8), 2023-12-19

# **Microbiome variation at the clam-sediment interface may explain changes in the local productivity of *Chamelea gallina* in the North Adriatic Sea**

Giulia Trapella<sup>1,4</sup>, Nicolò Cinti<sup>1</sup>, Luca Parma<sup>2</sup>, Antonina De Marco<sup>2,4</sup>, Andrea Nicolò Dell'acqua<sup>1,4</sup>, Silvia Turrone<sup>1</sup>, Simone Rampelli<sup>1,4</sup>, Daniel Scicchitano<sup>1,4</sup>, Letizia Iuffrida<sup>3,4</sup>, Alessio Bonaldo<sup>2</sup>, Silvia Franzellitti<sup>3,4</sup>, Marco Candela<sup>1,4</sup> and Giorgia Palladino<sup>1,4</sup>

## *Supplementary figures*

<sup>1</sup>Unit of Microbiome Science and Biotechnology, Department of Pharmacy and Biotechnology (FaBIT), Alma Mater Studiorum – University of Bologna, 40126 Bologna, Italy

<sup>2</sup>Department of Veterinary Medical Sciences, University of Bologna, 40064 Ozzano Emilia (Bologna), Italy

<sup>3</sup>Animal and Environmental Physiology Laboratory, Department of Biological, Geological and Environmental Sciences (BiGeA), University of Bologna, 48123 Ravenna, Italy

<sup>4</sup>Fano Marine Center, The Inter-Institute Center for Research on Marine Biodiversity, Resources and Biotechnologies, 61032 Fano, Italy

A)

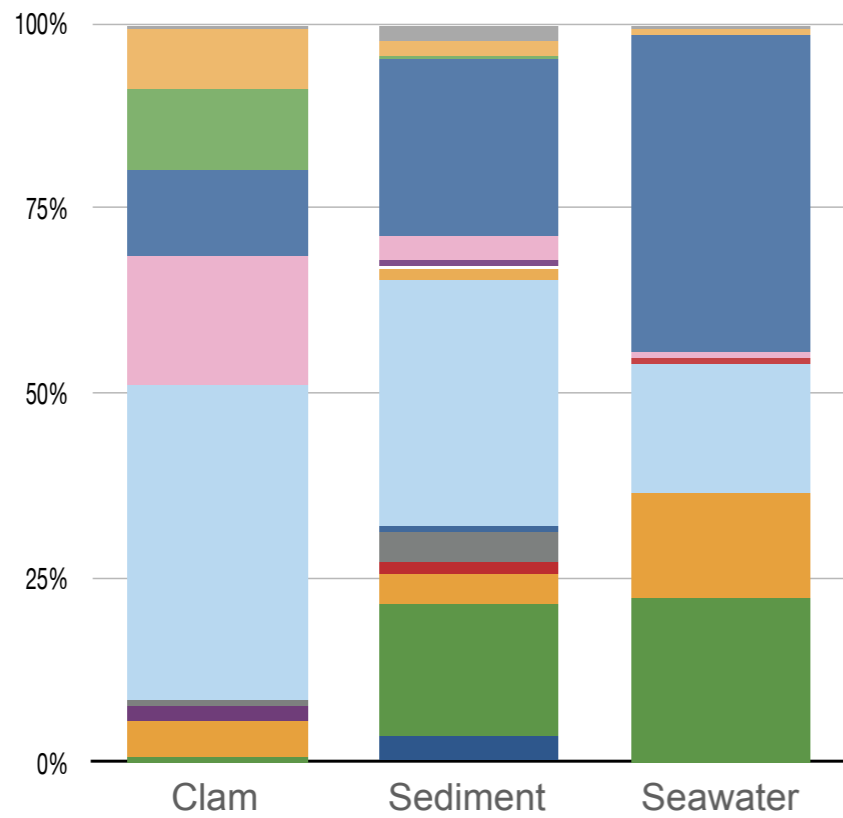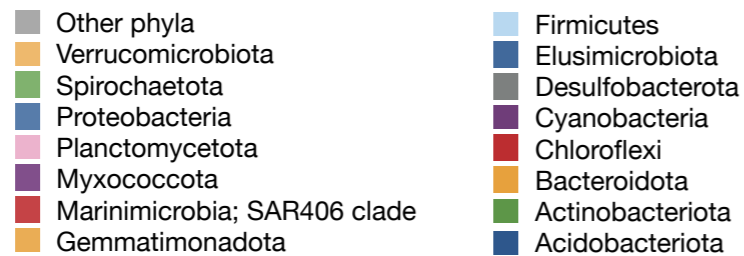

B)

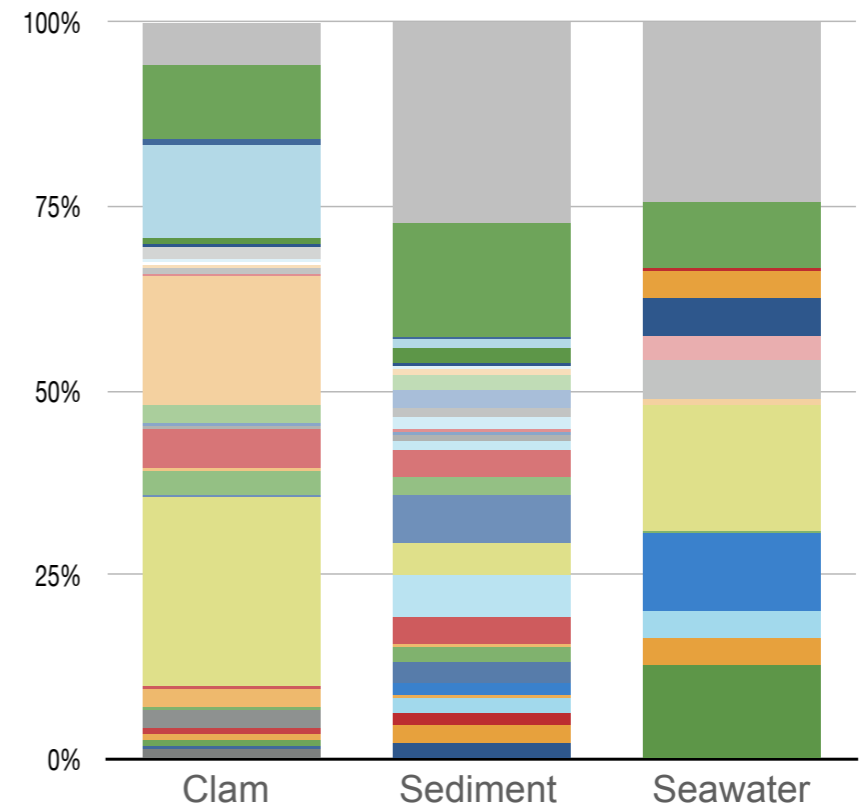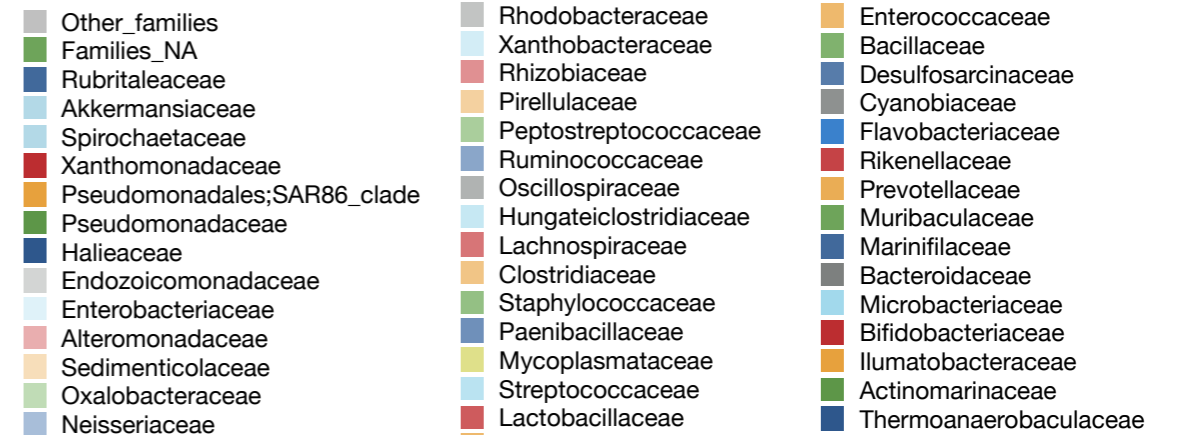

**Supplementary Figure S1 - Microbial communities associated with clam digestive glands, sediment and seawater in the North Adriatic Sea at phylum and family level.** Barplots summarizing the overall phylum (A) and family (B) level microbial composition of the different ecosystems, namely clam, sediment, and seawater. Phyla with relative abundance > 2% and families with relative abundance > 5% in at least 1 sample are represented. NA = not assigned.

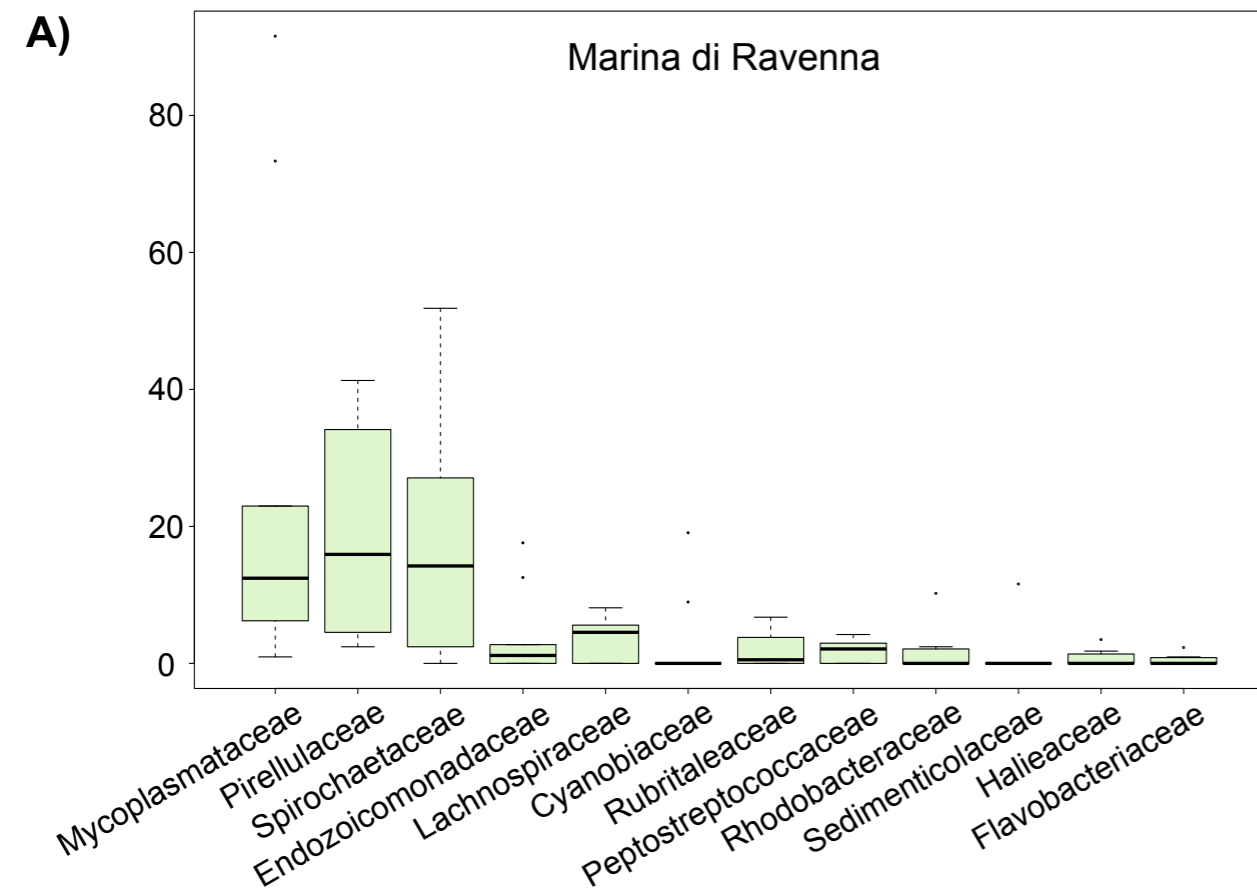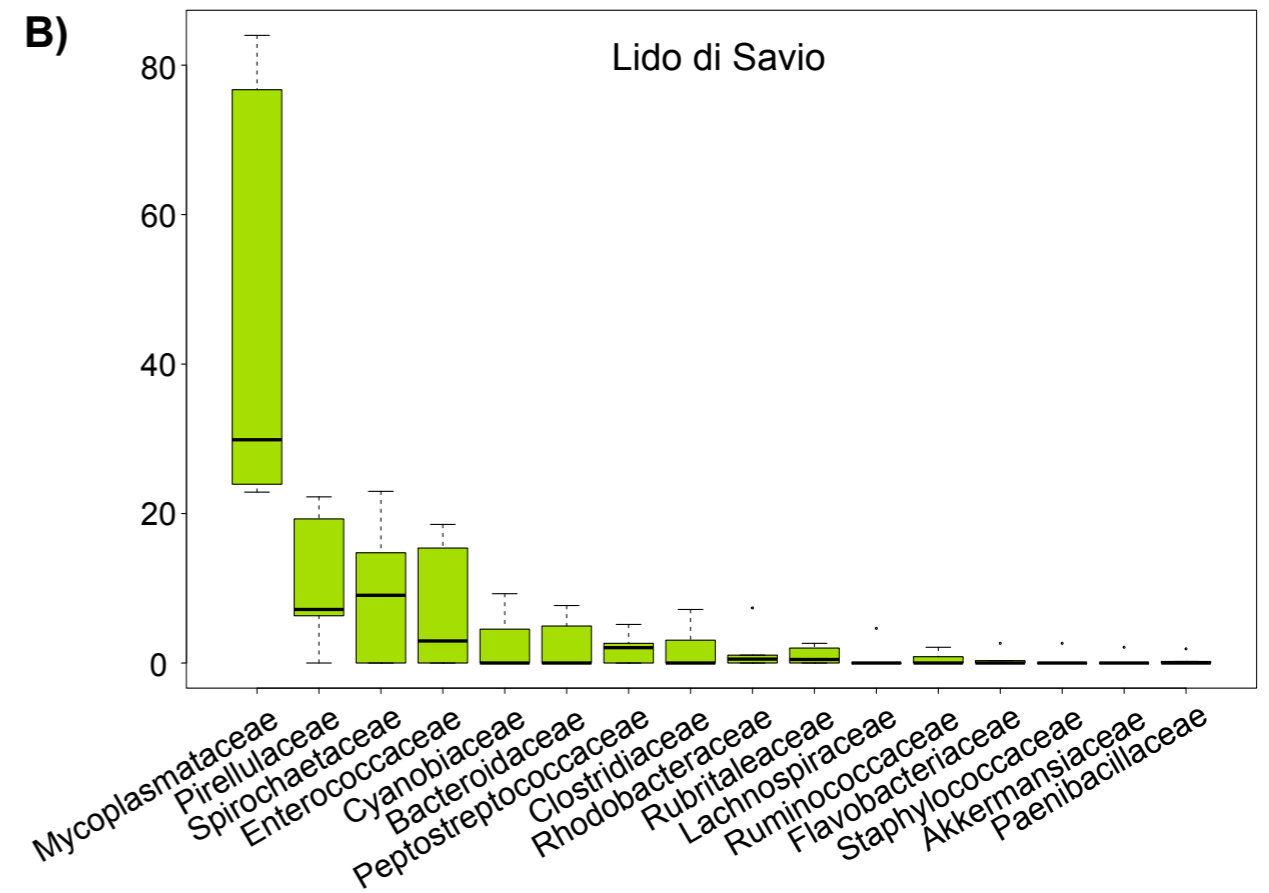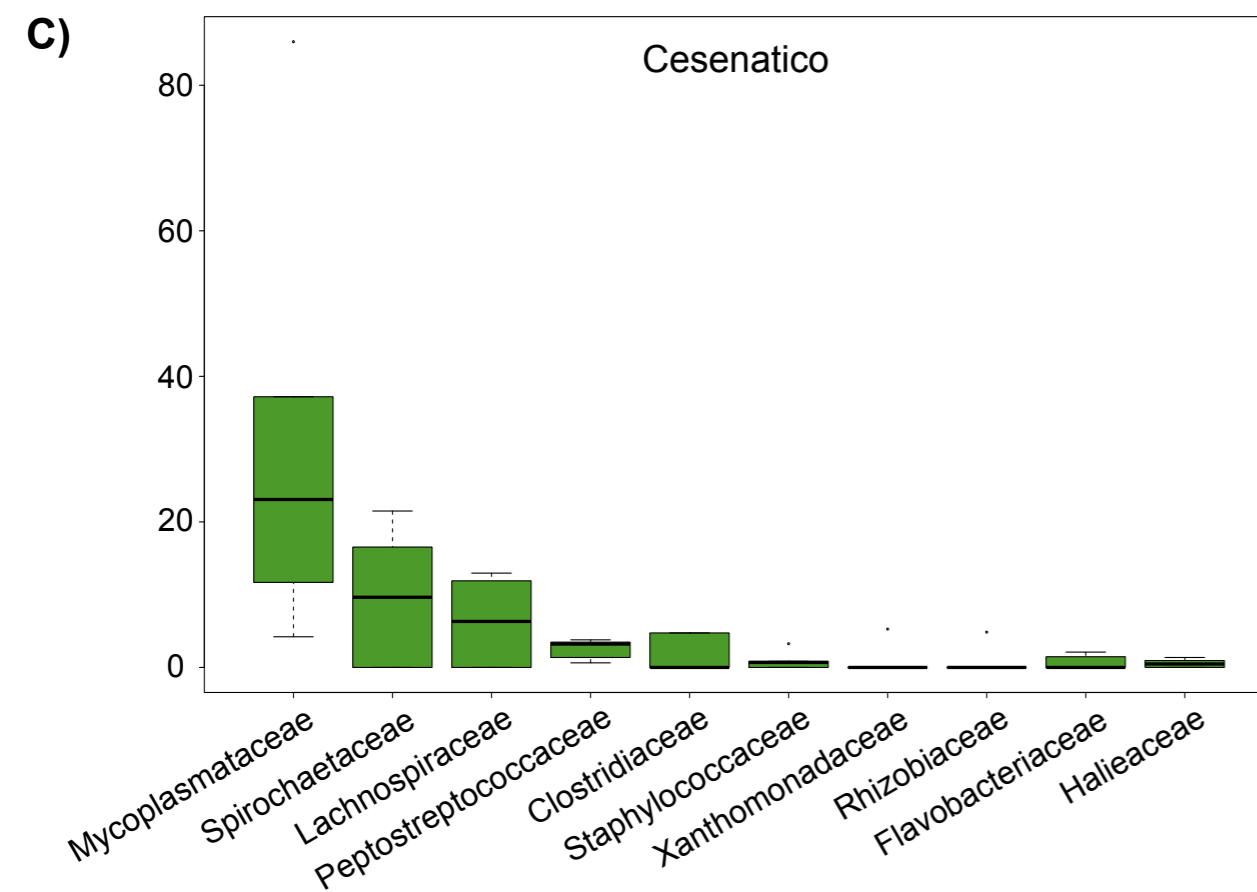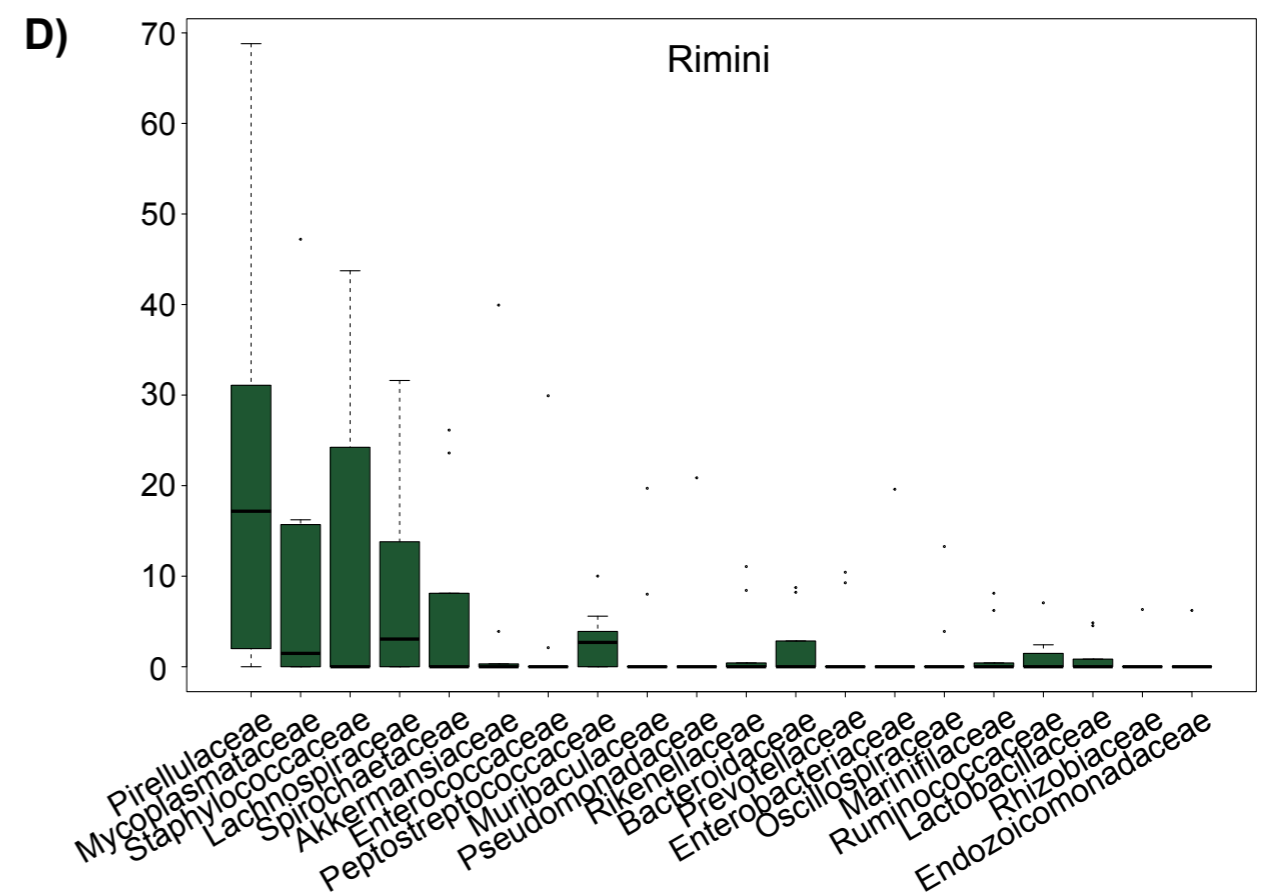

**Supplementary Figure S2 - Microbial communities associated with clam digestive glands from 4 production sites in the North Adriatic Sea at family level.** Boxplot summarizing the DG-associated microbial composition at the family level at the different sampling sites. Families with mean relative abundance (r.a.) > 0.5%, 0.4%, 0.5% and 0.6% for Marina di Ravenna, Lido di Savio, Cesenatico and Rimini, respectively, are represented. Different r.a. values were selected for representation purposes.

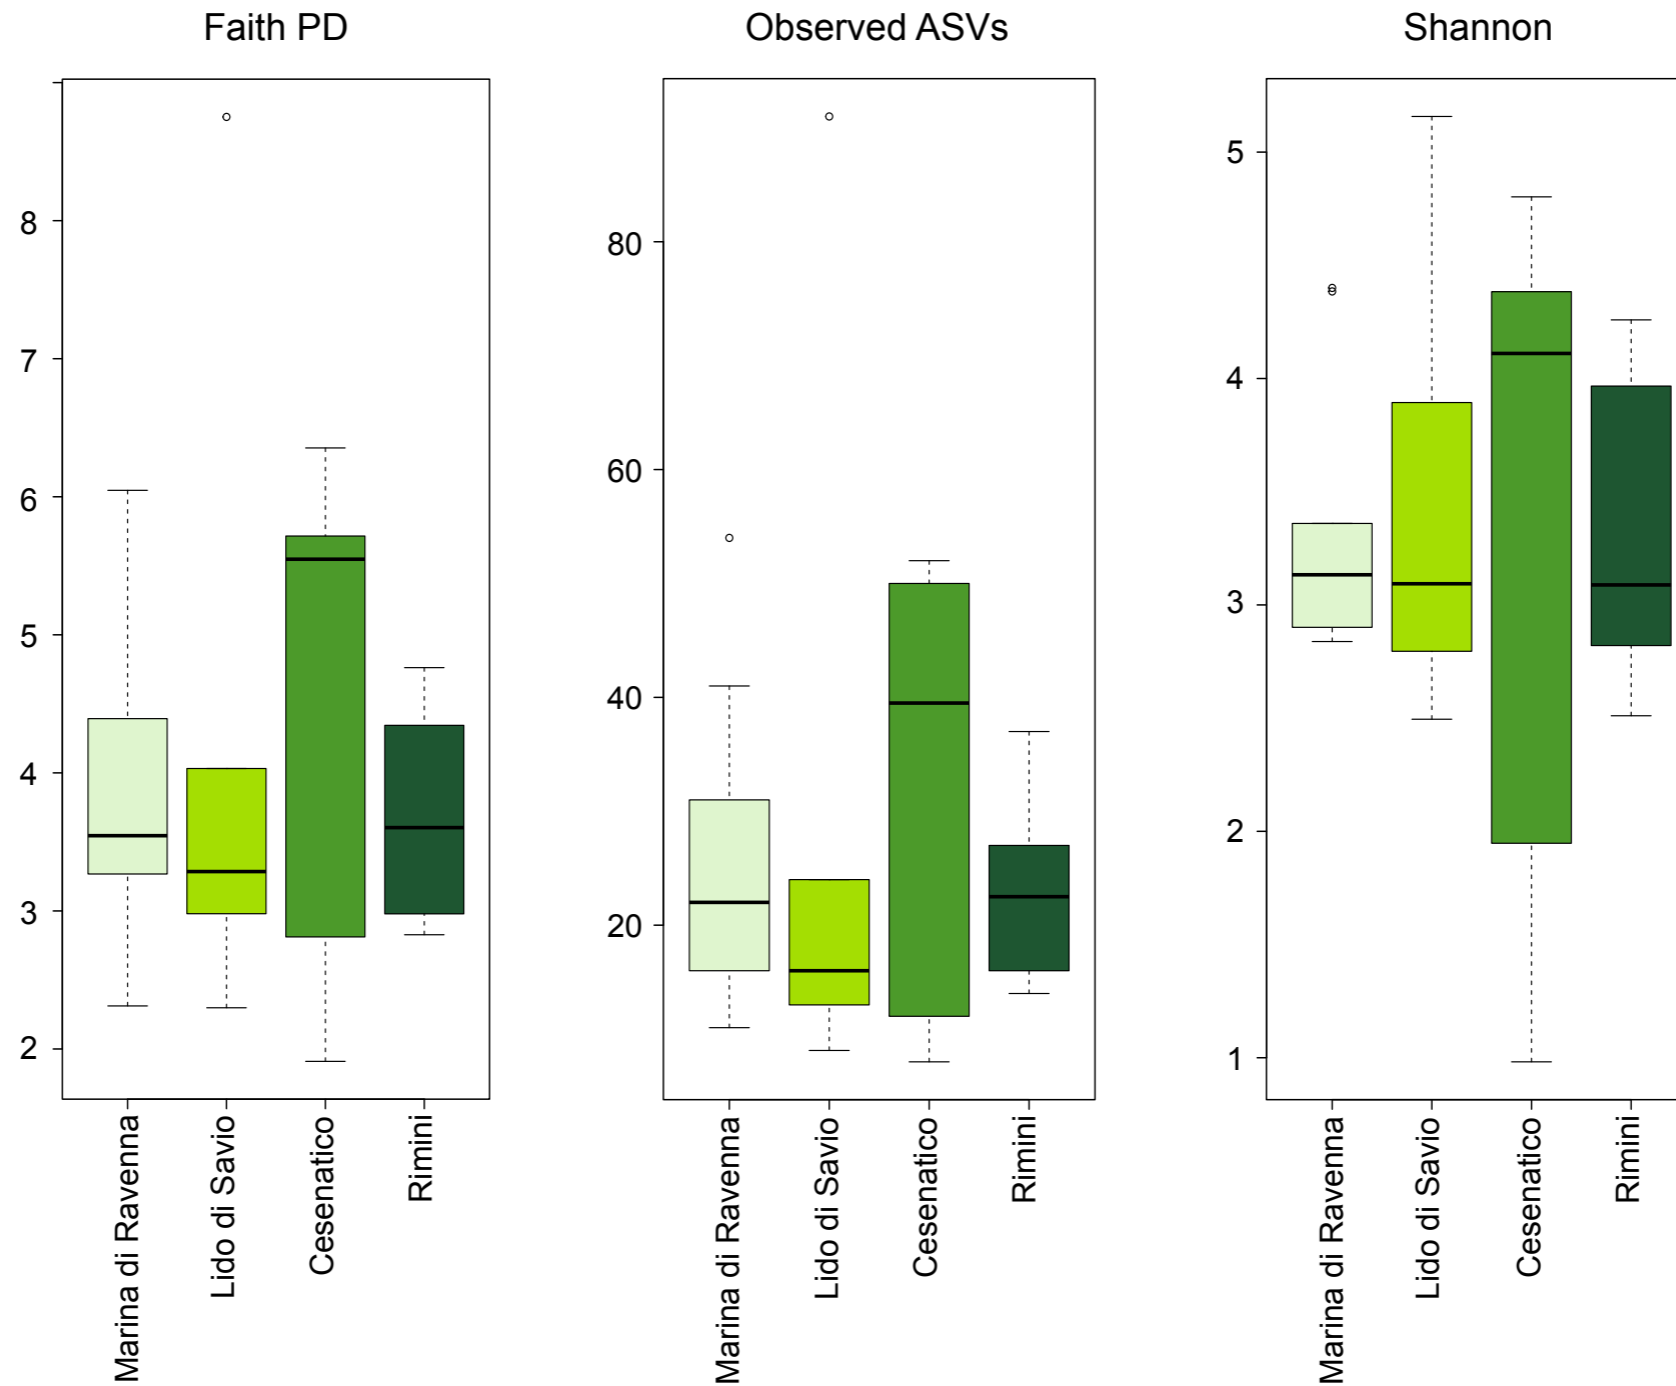

**Supplementary Figure S3 - Box-and-whiskers distribution of alpha diversity of *C. gallina* digestive gland-associated microbiome in the different sampling sites.** Faith's phylogenetic diversity (PD), the number of observed ASVs, and the Shannon index are represented. No significant p-values (Wilcoxon rank-sum test controlled for multiple testing using FDR) were found.

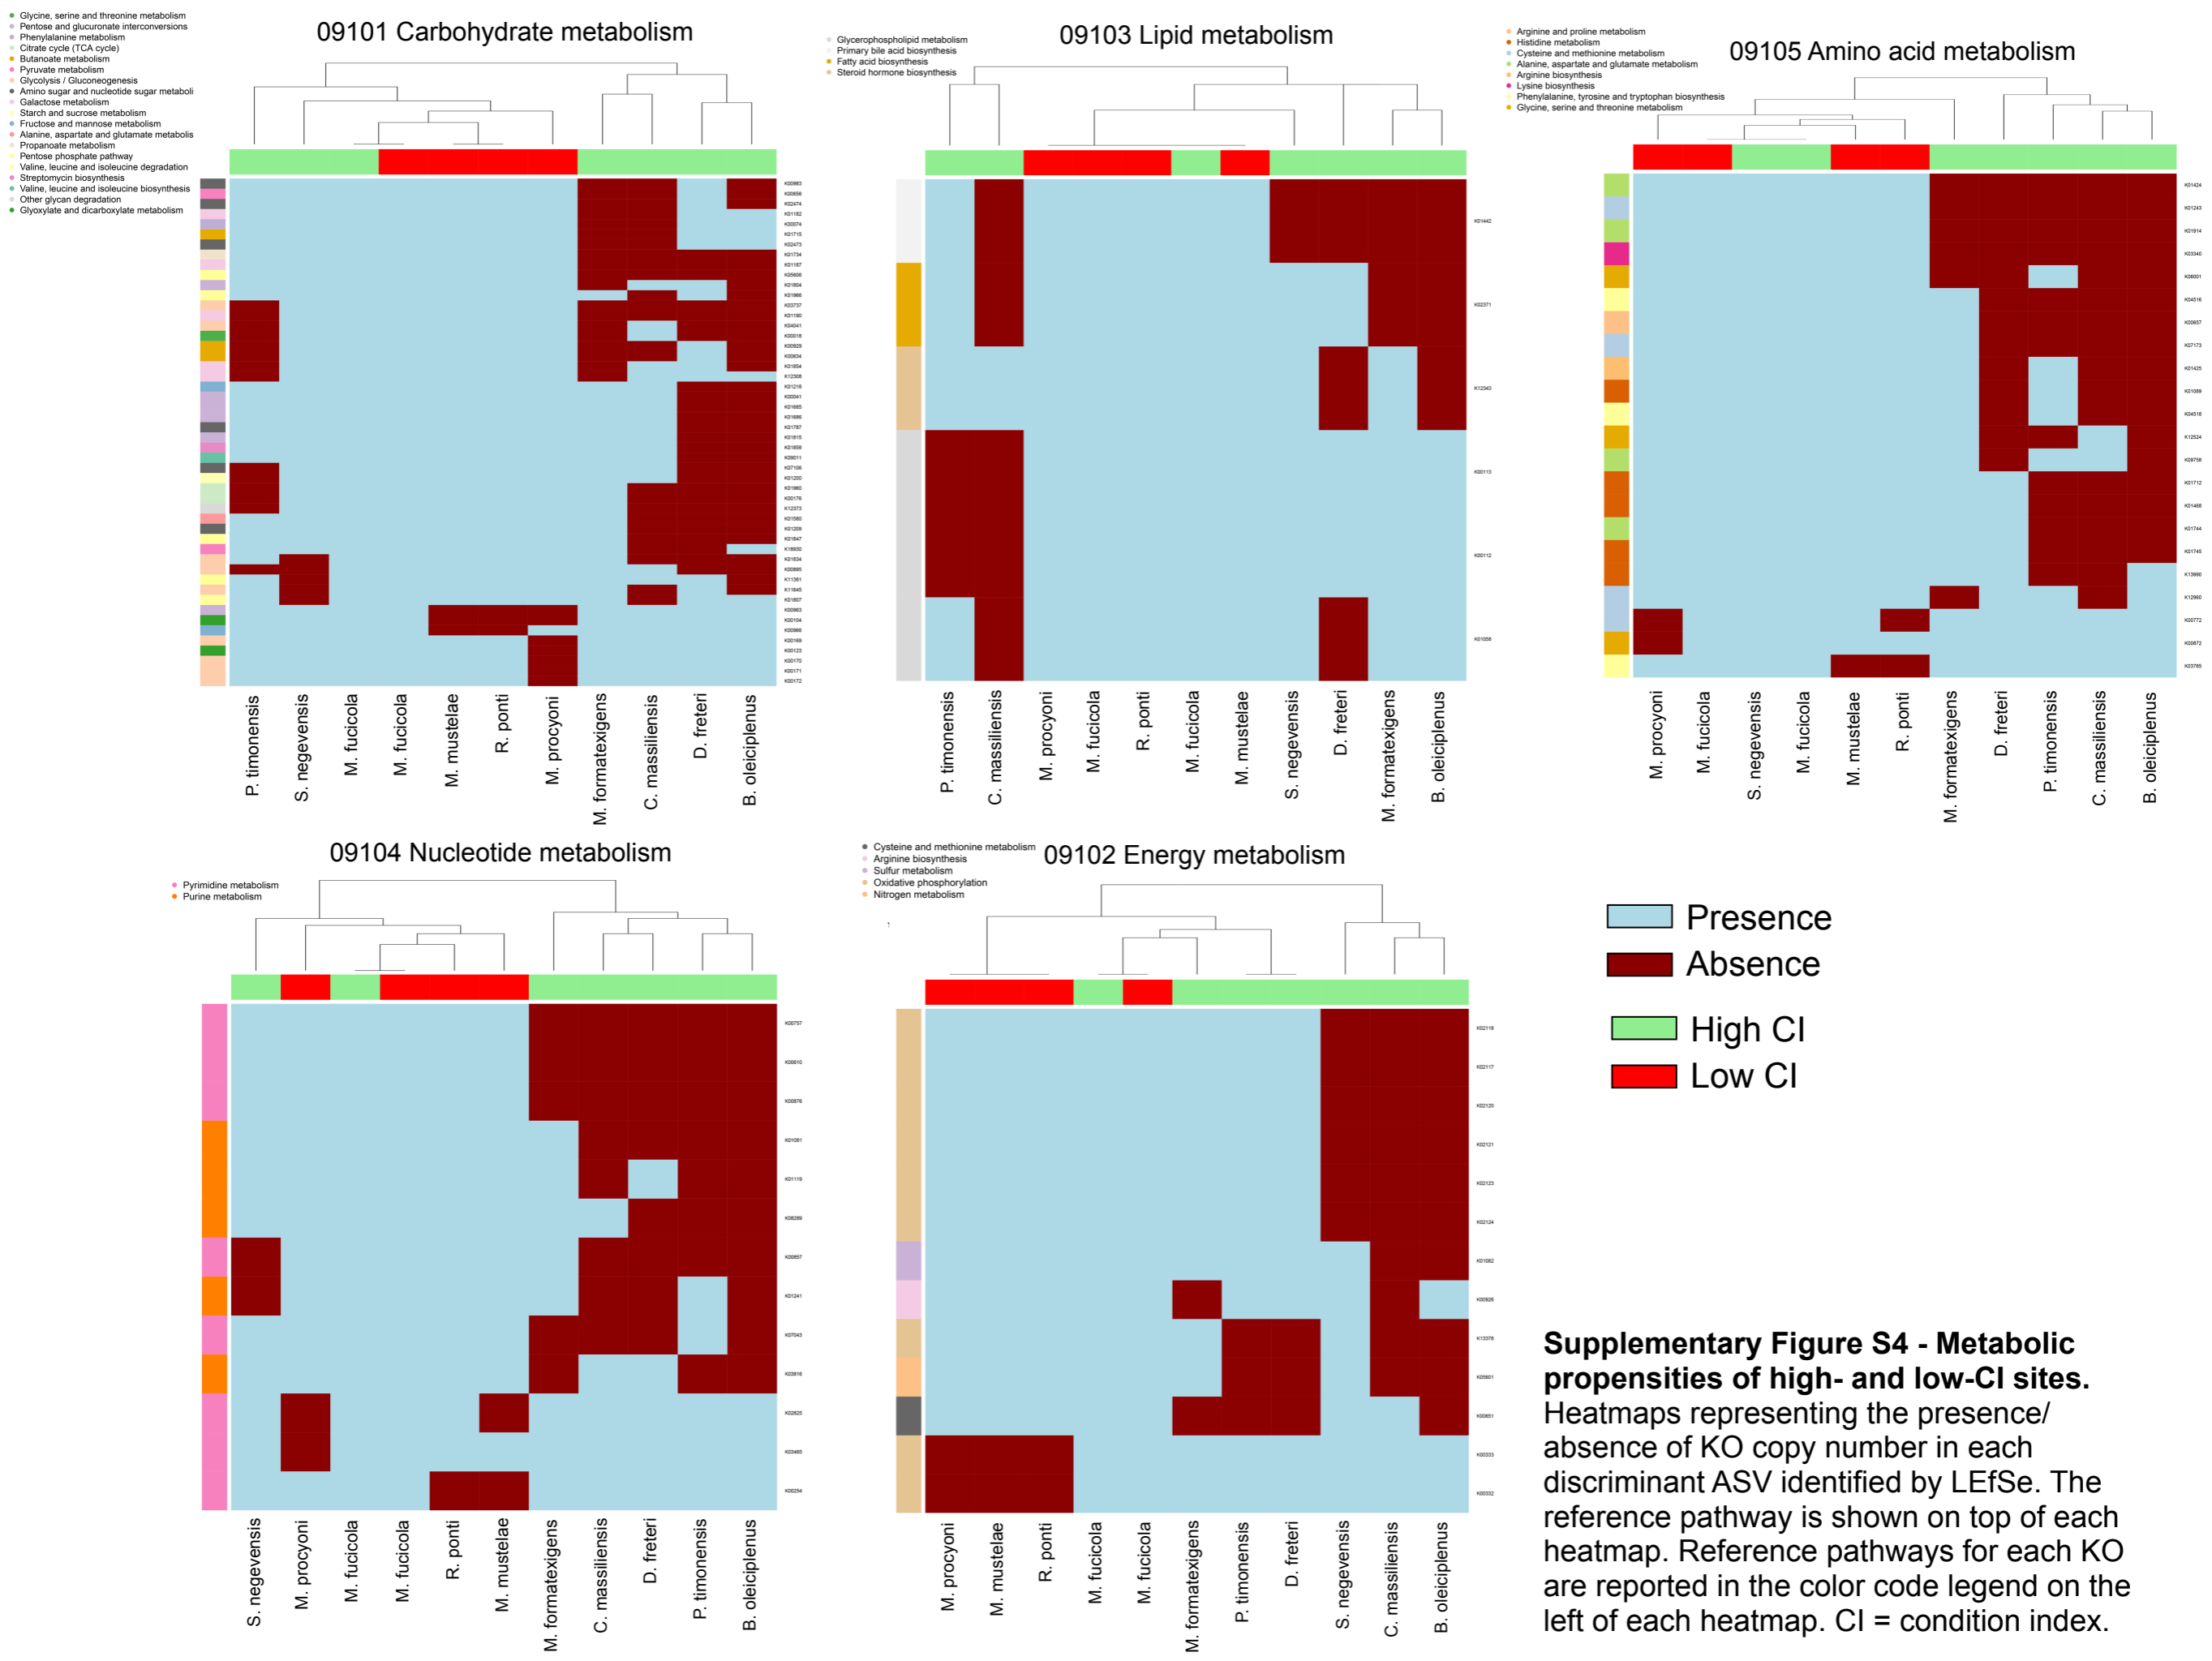

Supplement: MOESM2 [file 12866_2023_3146_MOESM2_ESM.pdf]
